# Supplementary material for: An aggregation-induced emission (AIE) ratiometric fluorescent cysteine probe with an exceptionally large blue shift
Source: Royal Society of Chemistry journal article supplement (doi:10.1039/c5ra22245a), 2016-01-01
Supplement: c5ra22245a1.pdf [file c5ra22245a1.pdf]

## Electronic Supplementary Information

An aggregation-induced emission (AIE) ratiometric fluorescent cysteine probe with  
an exceptionally large blue shift

Liqiang Yan, Zhineng Kong, Wei Shen, Wenqi Du, Yan Zhou and Zhengjian Qi \*

*College of Chemistry and Chemical engineering, Southeast University, Nanjing, Jiangsu, 211189,  
P.R. China.*

### Synthesis of 8-formyl-7-hydroxy-4-methylcoumarin

7-hydroxy-4-methylcoumarin (5.00 g, 28.4 mmol) and hexamine (10.00 g, 71 mmol) in acetic acid (37 mL) were stirred and refluxed for 5.5 h. Then, hydrochloric acid (75 mL, HCl : H<sub>2</sub>O = 84 : 100, v/v) was added and further reacted for 45 min. After cooling, the reaction mixture was poured into ice-water (375 mL) and extracted with ethyl acetate (150 mL × 3). The organic layer was dried over anhydrous Na<sub>2</sub>SO<sub>4</sub> and the solvent was removed. The residue was purified by column chromatography on silica gel using CH<sub>2</sub>Cl<sub>2</sub> as an eluent to obtain light yellow solid. Yield 0.9 g (15.5%).

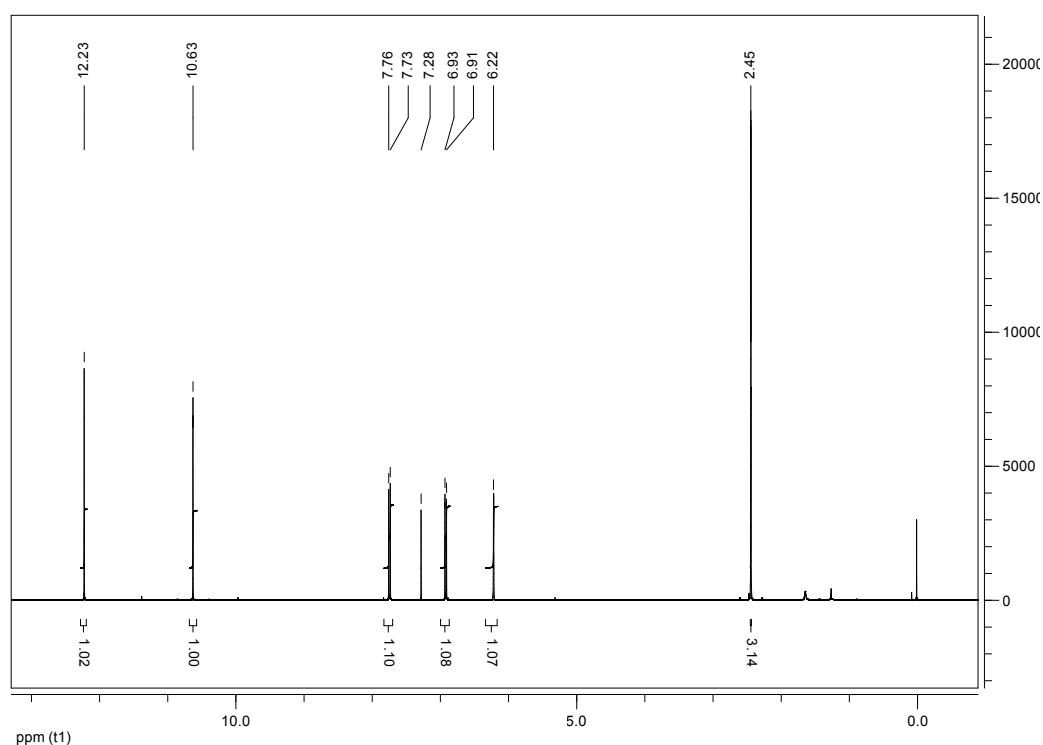

8-Formyl-7-hydroxy-4-methylcoumarin <sup>1</sup>H-NMR (CDCl<sub>3</sub>, 400MHz)

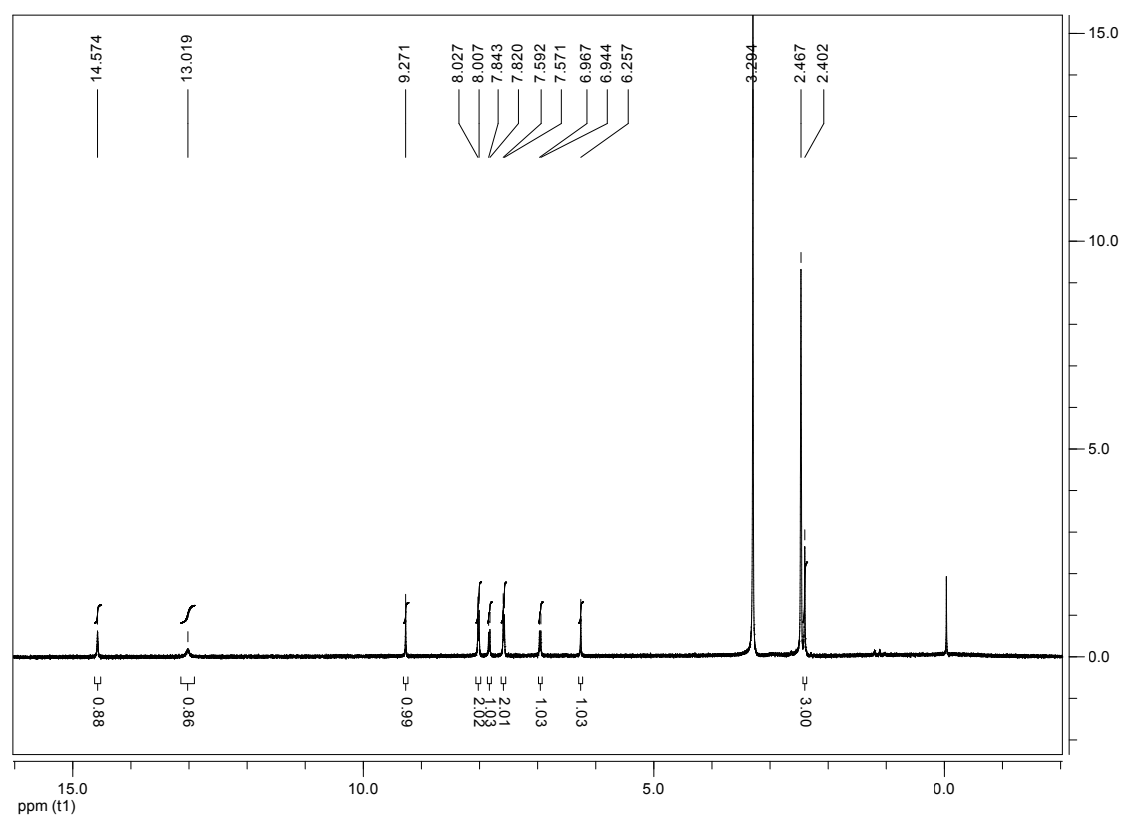

$^1\text{H}$  NMR of CPA in  $\text{DMSO-d}_6$ , 400MHz

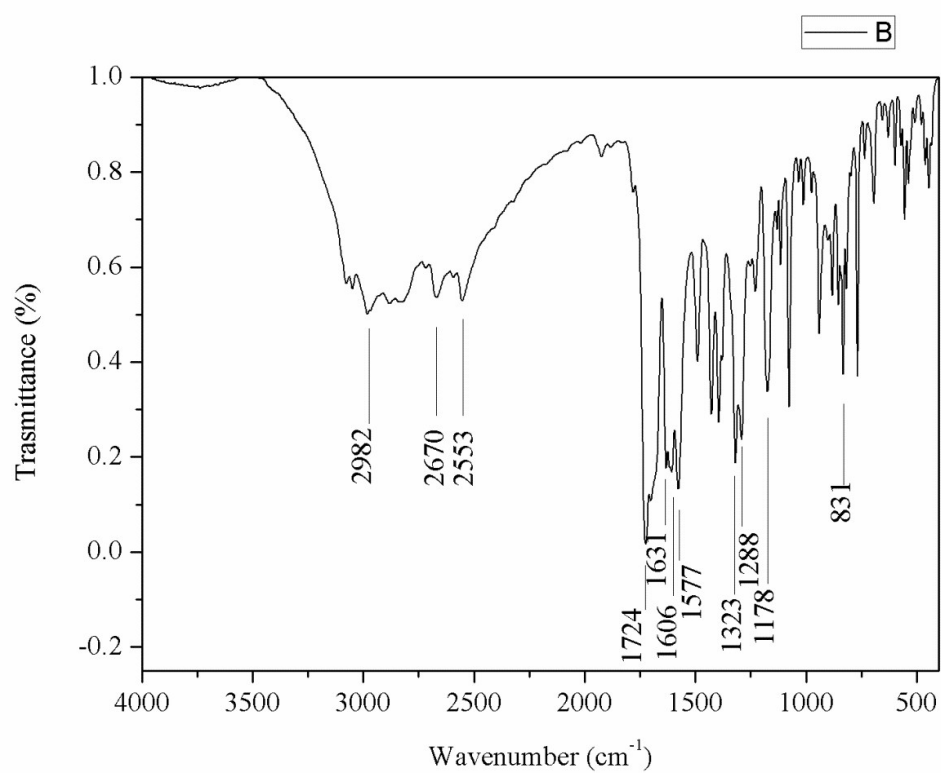

IR spectra of sensor CPA
